# Supplementary material
Source: ML conference proceedings conference paper supplement (https://openaccess.thecvf.com/content/CVPRW_2020/html/Mani_Automatic_Digitization_of_CVPRW_2020_paper.html)
Supplement: Supplementary file 1 [file Mani_Automatic_Digitization_of_CVPRW_2020_supplemental.pdf]

## Appendix

### A. Demo of P&ID digitization pipeline

In this section, we demonstrate the steps in our P&ID digitization pipeline: starting with an input diagram, detecting symbols and text, detecting connections between symbols, and producing an asset hierarchy table.

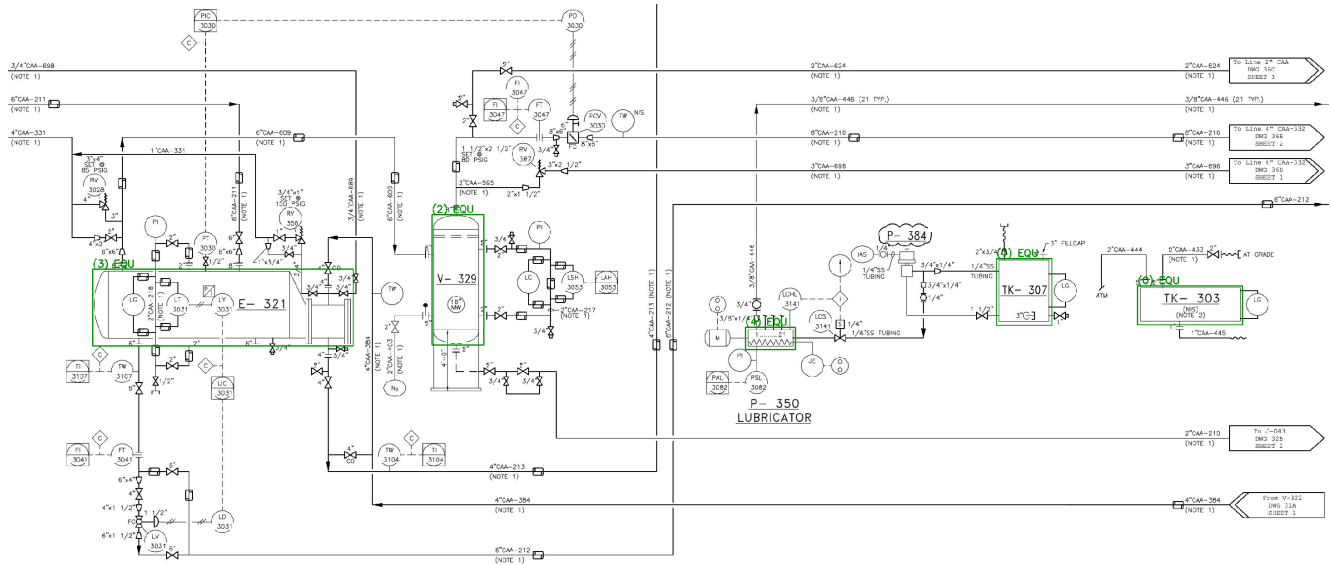

Figure 1. An input diagram to the pipeline with some manually-labeled symbols (green).

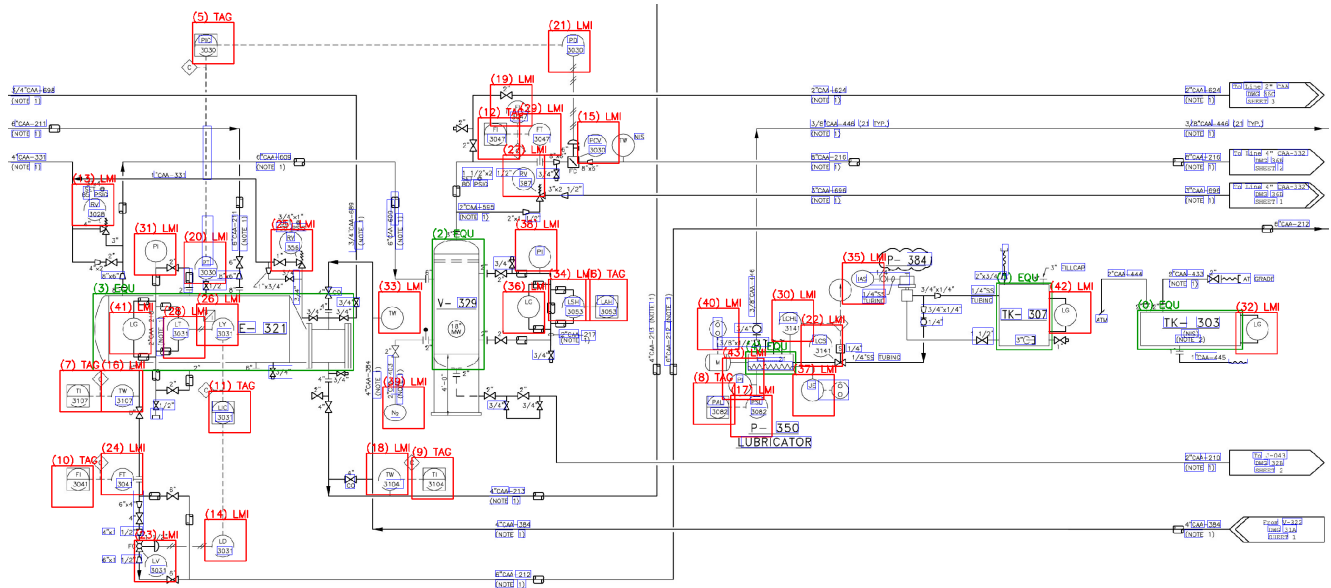

Figure 2. Detected symbols (red), detected text (blue), and manually-labeled symbols (green) in the input diagram. This is the intermediate result of the symbol detection and text detection steps.

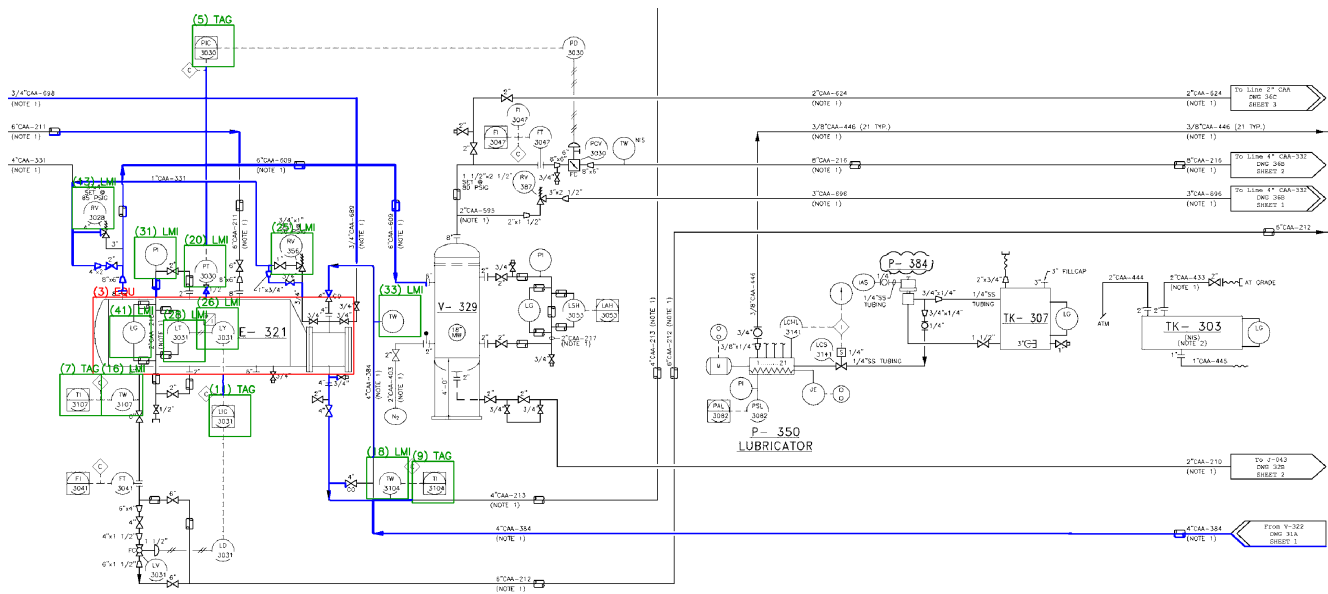

Figure 3. Connections detected between a source symbol (red) and connected symbols (green) in the diagram through lines traversed by depth-first search (blue).

| Symbol id | Method           | Symbol type | Associated text                                               | Connected symbols                                 |
|-----------|------------------|-------------|---------------------------------------------------------------|---------------------------------------------------|
| 0         | Manually-labeled | EQU         | MEYE, NIS, 303, CAA—A, TK—,                                   | 32                                                |
| 1         | Manually-labeled | EQU         | TUBING, FILLCAF, 307, MA, 2X34E, 14SS, E, TK-,...             | 42                                                |
| 2         | Manually-labeled | EQU         | NOYE, 329, 342, 1                                             | 34, 36, 38, 15, 19, 21, 27                        |
| 3         | Manually-labeled | EQU         | 3030, 321, CO, E“X6F, XVZ, E., XJA, BX6F, 303,...             | 33, 5, 7, 9, 41, 11, 13, 16, 18, 20, 25, 26, 2... |
| 4         | Manually-labeled | EQU         | KVVVVVVX, TM AT] T, PL, {8, 34?, JE, 7                        | 37, 8, 40, 43, 17, 22, 30                         |
| 5         | Detected         | TAG         | PLC                                                           | 3, 13, 20, 21, 25                                 |
| 6         | Detected         | TAG         | UFIÉ, 73, 3053, -2171, LSU, 3053, 2CAA                        | 34                                                |
| 7         | Detected         | TAG         | 3I07                                                          | 16, 3                                             |
| 8         | Detected         | TAG         | JJBRICATOR, P <sub>i</sub> I, 3082, 3082, KVVVVVVX, ; PAL, PL | 17, 43, 4                                         |
| 9         | Detected         | TAG         | NO                                                            | 18, 3                                             |
| 10        | Detected         | TAG         | 4“                                                            | 18, 3                                             |
| 11        | Detected         | TAG         | 7L?, XJA, 303J                                                | 3, 14                                             |
| 12        | Detected         | TAG         | PÉLC, RV, W, 3047, 387., 3047, 3047, ARM *2, 34X              | 27, 19, 29                                        |
| 13        | Detected         | LMI         | 3023, RV, 1251C, 3%                                           | 25, 3, 20, 5                                      |
| 14        | Detected         | LMI         | 3031                                                          | 24, 11, 23                                        |
| 15        | Detected         | LMI         | CH], 3030, NIS, 34X, 212                                      | 19, 2, 27, 21                                     |
| 16        | Detected         | LMI         | 3I07, XVI, MOE.9, 1                                           | 3, 7, 41, 24, 26, 28                              |
| 17        | Detected         | LMI         | JJBRICATOR, P <sub>i</sub> I, 3082, 3082, 350, ; PAL, PL      | 8, 43, 4                                          |
| 18        | Detected         | LMI         | ¿iCO, NO                                                      | 9, 3, 33                                          |
| 19        | Detected         | LMI         | 3047, 3047, 3047                                              | 2, 12, 15, 21, 27, 29                             |
| 20        | Detected         | LMI         | 3030, XVZ, BX6F, UFOZ, E, J91, E, RIÉ.00                      | 3, 5, 13, 25, 31                                  |
| 21        | Detected         | LMI         | PD, 3039                                                      | 2, 5, 15, 19, 27                                  |
| 22        | Detected         | LMI         | 4SS, KVVVVVVX, FL, 14, {8, ¿0, JE, 7                          | 4, 37, 30                                         |
| 23        | Detected         | LMI         | 3031, 6“, 4“, WZV VW, 1ZB, 3%                                 | 24, 14                                            |
| 24        | Detected         | LMI         | 3%, 30                                                        | 16, 14, 23                                        |

Table 1. The asset hierarchy table (showing the first 25 rows) populated with information extracted from the diagram by the pipeline.

### B. Symbol detection: detected symbols vs. ground truth

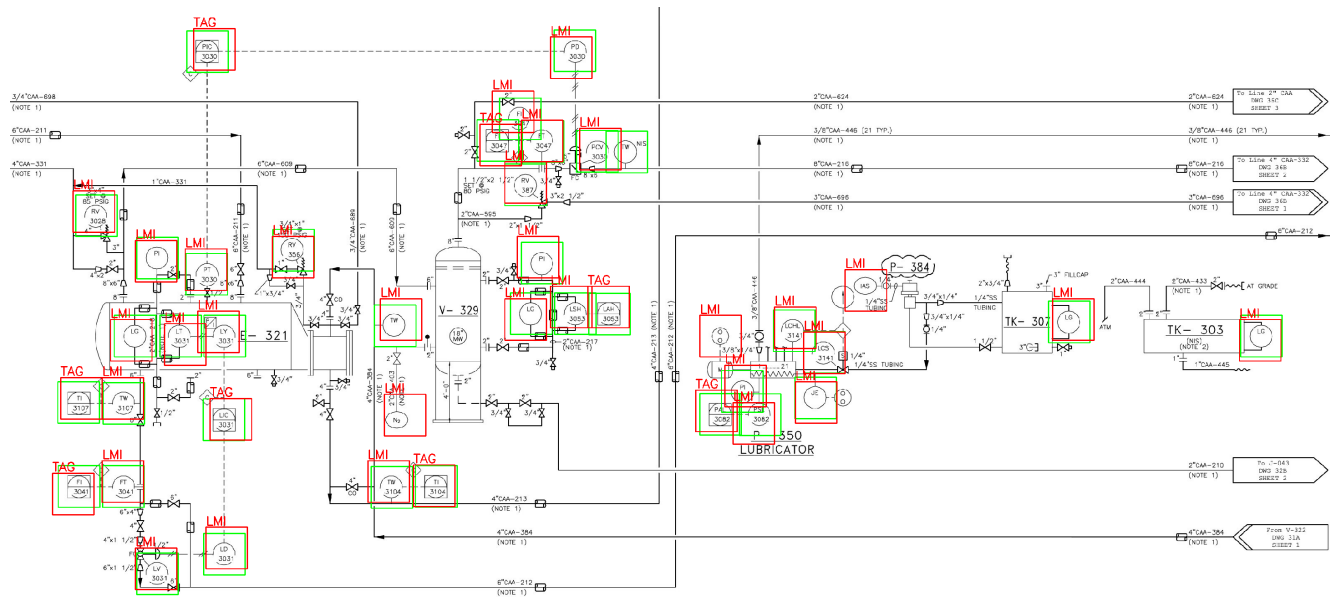

Figure 4. A comparison between symbols detected by the pipeline (red) and ground truth symbols (green) in the diagram.
